# Supplementary material for: Synthesis and photophysical properties of N-alkyl dithieno[3,2-b:2′,3′-d]pyrrole based donor/acceptor-π-conjugated copolymers for solar-cell application
Source: Royal Society of Chemistry journal article supplement (doi:10.1039/d2ra02608b), 2022-01-01
Supplement: d2ra02608b1.pdf [file d2ra02608b1.pdf]

## Supplementary Information

### Synthesis and photophysical properties of N-alkyl dithieno[3,2-b:2',3'-d]pyrroles based donor/acceptor- $\pi$ -conjugated copolymers for solar-cell application†

Cuc Kim Trinh,<sup>‡a,\*</sup> Gamal M. Nassar,<sup>‡bd</sup> Nabiha I Abdo,<sup>c</sup> Suhyun Jung,<sup>b</sup> Wonbin Kim<sup>b</sup>, Kwanghee Lee<sup>b</sup> and Jae-Suk Lee<sup>b,\*</sup>

<sup>a</sup>Chemical Engineering in Advanced Materials and Renewable Energy Research Group, School of Engineering and Technology, Van Lang University, Ho Chi Minh City, Vietnam. Email: cuc.tk@vlu.edu.vn

<sup>b</sup>School of Materials Science & Engineering, Gwangju Institute of Science and Technology (GIST), Gwangju 61005, Republic of Korea. Email: jslee@gist.ac.kr

<sup>c</sup>Higher Institute of Engineering and Technology, New Borg Al Arab, Alexandria, Egypt.

<sup>d</sup>Department of Chemistry, Faculty of Science, Tanta University, Tanta 31527, Egypt.

<sup>‡</sup> Contributed equally to this work.

## Supplementary Information

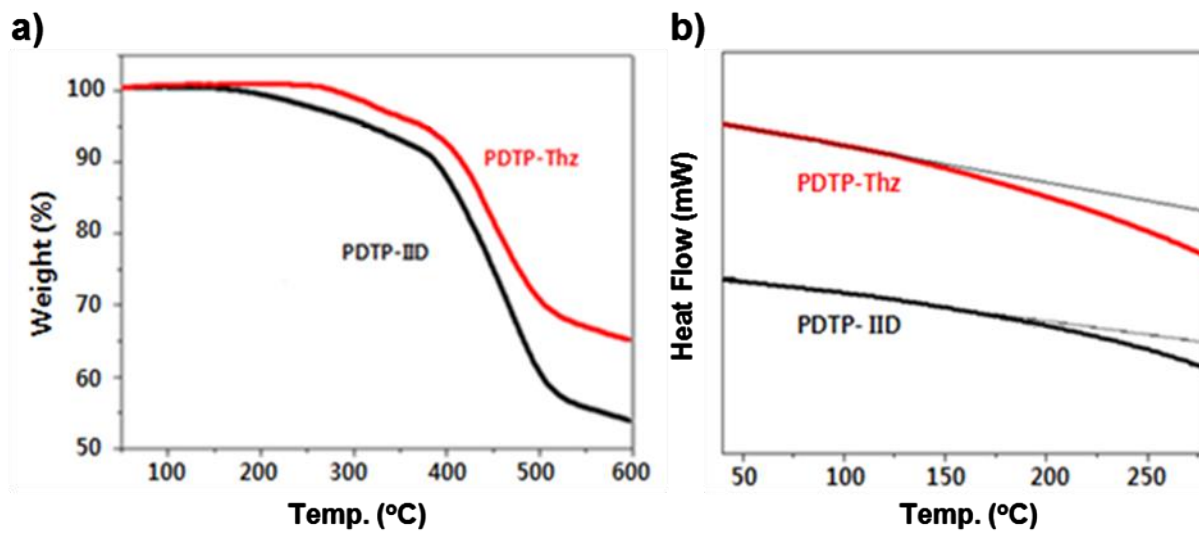

**Fig. S1** TGA curve a) and DSC curve b) of PDTP-IID and PDTP-Thz (heating rate: 10 °C/min, N<sub>2</sub>, atmosphere).

## Supplementary Information

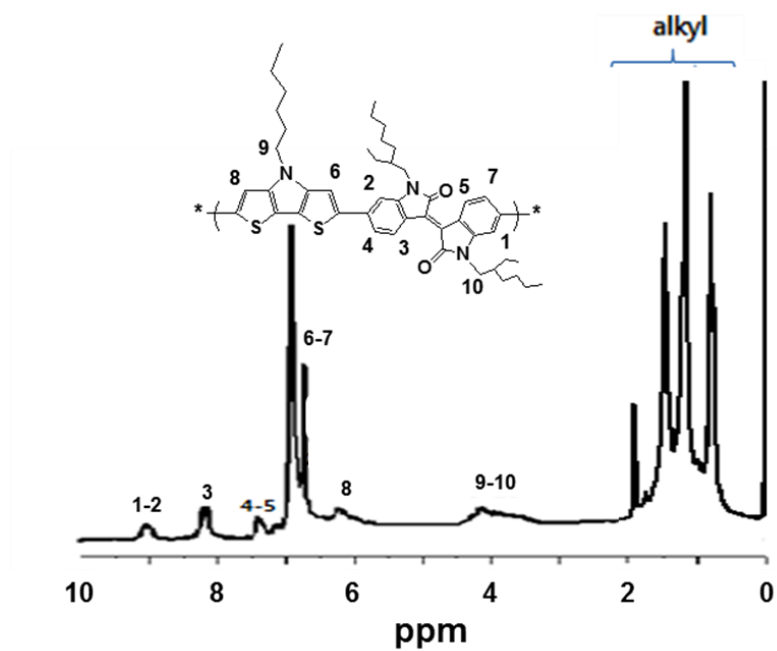

Fig. S2  $^1\text{H}$  NMR of PDTP-IIID in  $\text{CDCl}_3$ .

## Supplementary Information

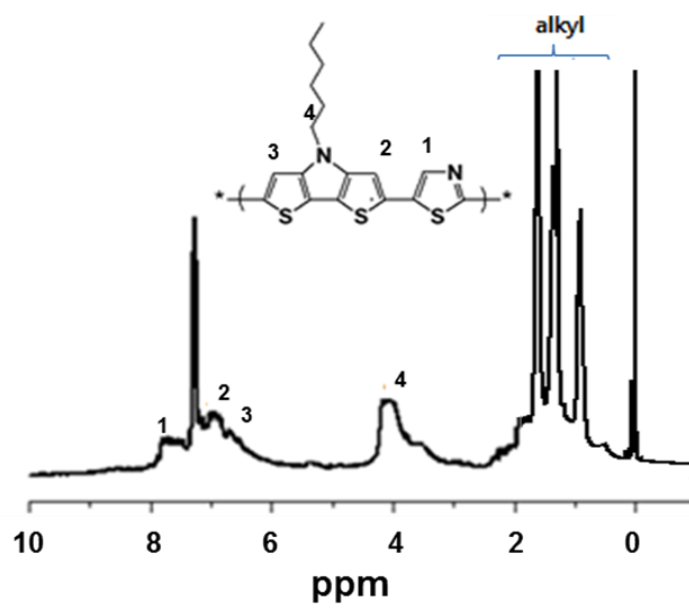

Fig. S3  $^1\text{H}$  NMR of PDTP-Thz in  $\text{CDCl}_3$ .
